## **Brief Research Report**

# **The effect of object type on building scene imagery – an MEG study**

1 **Anna M. Monk, Gareth R. Barnes and Eleanor A. Maguire\***

2 Wellcome Centre for Human Neuroimaging, UCL Queen Square Institute of Neurology, University  
3 College London, London, UK

4

5 **\* Correspondence:**

6 Eleanor A. Maguire

7 [e.maguire@ucl.ac.uk](mailto:e.maguire@ucl.ac.uk)

8

9 **Keywords:** scenes; objects; space defining; magnetoencephalography (MEG); hippocampus; theta;  
10 vmPFC; DCM

11

12 **Word count of main body of the text:** 3767

13 **Number of tables:** 1

14 **Number of figures:** 3

15

## 16 **ABSTRACT**

17 Previous studies have reported that some objects evoke a sense of local three-dimensional space (space-  
18 defining; SD), while others do not (space-ambiguous; SA), despite being imagined or viewed in  
19 isolation devoid of a background context. Moreover, people show a strong preference for SD objects  
20 when given a choice of objects with which to mentally construct scene imagery. When deconstructing  
21 scenes, people retain significantly more SD objects than SA objects. It therefore seems that SD objects  
22 might enjoy a privileged role in scene construction. In the current study we compared the neural  
23 responses to SD and SA objects while they were being used to build imagined scene representations,  
24 as this has not been examined before using neuroimaging. On each trial, participants gradually built a  
25 scene image from three successive auditorily-presented object descriptions and an imagined 3D space.  
26 In order to capture the neural dynamics associated with the points during scene construction when  
27 either SD or SA objects were being imagined, we leveraged the high temporal resolution of  
28 magnetoencephalography. We found that while these object types were being imagined during scene  
29 construction, SD objects elicited theta changes relative to SA objects in two brain regions, the  
30 ventromedial prefrontal cortex (vmPFC) and superior temporal gyrus (STG). Furthermore, using  
31 dynamic causal modelling, we observed that the vmPFC drove STG activity. These results indicate  
32 that SD objects were processed differently to SA objects, and we suggest that SD objects may activate  
33 schematic and conceptual knowledge in vmPFC and STG upon which scene representations are built.

## 34 INTRODUCTION

35 Our lived experience of the world comprises a series of scenes that are perceived between the  
36 interruptions imposed by eye blinks and saccades. Indeed, scene mental imagery has been shown to  
37 dominate when people engage in critical cognitive functions such as recalling the past, imagining the  
38 future and spatial navigation (Clark et al., 2020; Andrews-Hanna et al., 2010; see also Clark et al.,  
39 2019). It is not surprising, therefore, that visual scenes have been deployed extensively as stimuli in  
40 cognitive neuroscience.

41 A scene is defined as a naturalistic three-dimensional spatially-coherent representation of the  
42 world typically populated by objects and viewed from an egocentric perspective (Dalton et al., 2018;  
43 Maguire and Mullally, 2013). Neuroimaging and neuropsychological studies have identified a number  
44 of brain areas that seem to be particularly engaged during the viewing and imagination of scenes  
45 including the ventromedial prefrontal cortex (vmPFC; Zeidman et al., 2015a; Bertossi et al., 2016;  
46 Barry et al., 2019a), the anterior hippocampus (Hassabis et al., 2007a, 2007b; Summerfield et al., 2010;  
47 Zeidman et al., 2015a, 2015b; Dalton et al., 2018; reviewed in Zeidman and Maguire, 2016), the  
48 posterior parahippocampal cortex (PHC; Epstein and Kanwisher, 1998; reviewed in Epstein, 2008 and  
49 Epstein and Baker, 2019), and the retrosplenial cortex (RSC; Park and Chun, 2009; reviewed in  
50 Epstein, 2008; Vann et al., 2009; Epstein and Baker, 2019). How are scene representations built, and  
51 what specific roles might these brain regions play?

52 While spatial aspects of scenes have been amply investigated and linked to the hippocampus  
53 (Byrne et al., 2007; Morgan et al., 2011; Epstein et al., 2017; Epstein and Baker, 2019), the higher-  
54 order properties of objects within scenes have received comparatively less attention (Auger et al., 2012;  
55 Troiani et al., 2014; Julian et al., 2017; Epstein and Baker, 2019), and yet they could influence how  
56 scene representations are constructed by the brain. One object attribute that seems to play a role in  
57 scene construction was reported by Mullally and Maguire (2011; see Kravitz et al., 2011 for related  
58 work). They observed that certain objects, when viewed or imagined in isolation, evoked a strong sense  
59 of three-dimensional local space surrounding them (space-defining (SD) objects), while others did not  
60 (space-ambiguous (SA) objects), and this was associated with engagement of the PHC during  
61 functional MRI (fMRI). This SD-SA effect could not be explained by object size, contextual  
62 associations, or whether or not an object was moveable or maintained a permanent location – although  
63 more SD than SA objects were permanent, this feature was linked to the RSC (see also Auger et al.,  
64 2012, 2015; Auger and Maguire, 2013; Troiani et al., 2014). In a subsequent behavioural study,  
65 participants showed a strong preference for SD objects when given a choice of objects with which to  
66 mentally construct scenes, even when comparatively larger and more permanent SA objects were  
67 available (Mullally and Maguire, 2013). Moreover, when deconstructing scenes, participants retained  
68 significantly more SD objects than SA objects. It therefore seems that SD objects might enjoy a  
69 privileged role in scene construction.

70 Mullally and Maguire (2011) examined SD and SA objects in isolation. However, given their  
71 apparent influence during scene construction (Mullally and Maguire, 2013), in the current study we  
72 compared neural responses to SD and SA objects while they were being used to build imagined scene  
73 representations. We adapted a paradigm from Dalton et al. (2018) and Monk et al. (preprint) where  
74 participants gradually built a scene image from three successive auditorily-presented object  
75 descriptions and an imagined 3D space. In order to capture the neural dynamics associated with the  
76 points during scene construction when either SD or SA objects were being imagined, we leveraged the  
77 high temporal resolution of magnetoencephalography (MEG). In previous MEG studies, changes in  
78 vmPFC and anterior hippocampal theta were noted when participants imagined scenes in response to

79 scene-evoking cue words (Barry et al., 2019a, 2019b), and when scene imagery was gradually built  
80 (Monk et al., preprint), but the effect, if any, of SD and SA objects on brain responses remains  
81 unknown.

82 As well as performing whole brain analyses, we also focused on the following scene-responsive  
83 brain areas as particular regions of interest (ROIs) – vmPFC, anterior hippocampus, PHC and RSC –  
84 and characterized the effective connectivity between any brain regions that emerged from these  
85 analyses. In addition, while our main interest was in theta, we also examined other frequencies across  
86 the whole brain and in the ROIs. The obvious prediction, given the previous Mullally and Maguire  
87 (2011) fMRI study, was that PHC would be engaged by SD objects. However, because all stimuli were  
88 scenes, and the key manipulation of SD and SA objects within scenes was so subtle, we retained an  
89 open mind about which brain areas might distinguish between the two object types.

## 90 **MATERIALS AND METHODS**

### 91 **Participants**

92 Twenty-three healthy, right-handed people (13 females; mean age = 25.35 years; standard deviation =  
93 3.69) participated in the experiment. All were fluent English speakers with normal vision. Participants  
94 were reimbursed £10 per hour for taking part which was paid at study completion. The study was  
95 approved by the University College London Research Ethics Committee (project ID: 1825/005). All  
96 participants gave written informed consent in accordance with the Declaration of Helsinki.

### 97 **Stimuli**

98 The task, adapted from Dalton et al. (2018) and Monk et al. (preprint), involved participants gradually  
99 constructing simple scenes in their imagination from a combination of auditorily-presented SD and SA  
100 object descriptions (see examples in Figure 1A) and a 3D space. SD and SA object classification was  
101 made as part of the previous Dalton et al. (2018) study. SD and SA objects were matched on utterance  
102 length ( $Z = 1.643$ ,  $p < 0.1$ ) and number of syllables ( $Z = 1.788$ ,  $p < 0.074$ ). Unsurprisingly, SD objects  
103 were rated as more permanent than SA objects ( $Z = 5.431$ ,  $p < 0.001$ ). All objects were rated as highly  
104 imageable, obtaining a score of at least 4 on a scale from 1 (not imageable) to 5 (extremely imageable).  
105 Objects in each triplet were not contextually related to each other. Participants in the current MEG  
106 study were unaware of the SD-SA distinction.

### 107 **Task and Procedure**

108 The Cogent2000 toolbox (<http://www.vislab.ucl.ac.uk/cogent.php>) run in Matlab was used to present  
109 stimuli and record responses in the MEG scanner. Auditory stimuli were delivered via MEG-  
110 compatible earbuds. Each trial started with a visual cue (4 sec), which displayed the configuration of  
111 locations at which objects should be imagined in the upcoming trial (Figure 1B). Four different cue  
112 configurations (Figure 2) were randomized across the five scanning blocks. Participants then fixated  
113 on the screen center (1 sec). During the scene construction task (~9 sec) (Figure 1B), keeping their  
114 eyes open whilst looking at a blank screen, participants first imagined a 3D grid covering  
115 approximately the bottom two-thirds of the blank screen. Upon hearing each of three auditory  
116 descriptions, one at a time, they imagined the objects in the separate, cue-specified positions on the 3D  
117 grid. They were instructed to move their eyes to where they were imagining each object on the screen,  
118 but also to maintain imagery of previous objects and the grid in their fixed positions. Each construction  
119 stage consisted of a ~2 sec object description and a silent 1 sec gap before the presentation of the next  
120 object. An additional 1 sec at the end of scene construction avoided an abrupt end to the task. By the

121 end of a trial, participants had created a mental image of a simple scene composed of a 3D grid and  
122 three objects. Vividness of the entire scene was then rated on a scale of 1 (not vivid at all) to 5  
123 (extremely vivid). An inter-trial interval (2 sec) preceded the next trial.

124 Participants imagined a total of 66 scenes (composed of 99 SD, 99 SA objects). Each object  
125 description was heard only once. The order of presentation of SD and SA objects within triplets was  
126 balanced across scenes with an equal number of SD and SA objects in the first, second and third  
127 construction stages (33 in each). A control task (33 trials) involved participants attending to a backward  
128 series of auditorily-presented numbers, and was designed to provide relief from the effortful  
129 imagination task; it was not subject to analysis. Seven catch trials (5 scenes, 2 counting) were  
130 pseudorandomly presented across blocks to ensure that participants sustained attention - participants  
131 pressed a button upon hearing a repeated object description or number within a triplet.

### 132 **Eye Tracking**

133 Eye movements were recorded during the MEG scan using an Eyelink 1000 Plus (SR Research) eye  
134 tracking system with a sampling rate of 2000 Hz. The right eye was used for calibration and data  
135 acquisition. For some participants the calibration was insufficiently accurate, leaving 19 data sets for  
136 the eye tracking analyses.

### 137 **Surprise Post-Scan Memory Test**

138 Immediately following the MEG scan, participants completed a surprise memory test. They were  
139 presented with a randomized order of all previously heard auditory object descriptions and an  
140 additional 33 SD and 33 SA object description lures. After hearing each item, they indicated whether  
141 or not they had heard the object description during the scan, and their confidence in their decision (1 =  
142 low, to 5 = high).

### 143 **Behavioral Data Analysis**

144 In-scanner vividness was compared between SD-majority (2 of 3 objects were SD) and SA-majority  
145 scenes (2 of 3 objects were SA) using a paired-samples t-test. Eye tracking data were analyzed using  
146 two-way repeated measures ANOVAs. Memory performance was assessed using the sensitivity index  
147  $d'$  and response bias  $c$  (Macmillan and Creelman, 1990). Differences in  $d'$  and  $c$  as a function of object  
148 type (SD, SA) and construction stage (first, second, third) were each analyzed using a two-way repeated  
149 measures ANOVA. Statistical analyses were performed in SPSS25 using a significance threshold of  $p$   
150  $< 0.05$ . In cases where Mauchly's test found sphericity violated, Greenhouse-Geisser adjusted degrees  
151 of freedom were applied.

### 152 **MEG Data Acquisition and Preprocessing**

153 MEG data were recorded using a 275 channel CTF Omega MEG system with a sampling rate of  
154 1200 Hz. Head position fiducial coils were attached to the three standard fiducial points (nasion, left  
155 and right preauricular) to monitor head position continuously throughout acquisition. Recordings were  
156 filtered with a 1 Hz high-pass filter, 48-52 Hz stop-band filter, and 98-102 Hz stop-band filter, to  
157 remove slow drifts in signals from the MEG sensors and power line interference.

158

159

## 160 **MEG Data Analysis**

161 All MEG analyses were conducted using SPM12 ([www.fil.ion.ucl.ac.uk/spm](http://www.fil.ion.ucl.ac.uk/spm)). Source reconstruction  
162 was performed using the DAiSS toolbox (<https://github.com/SPM/DAiSS>) and visualized using  
163 MRIcroGL (<https://www.mccauslandcenter.sc.edu/mricrogl>).

### 164 *Source Reconstruction*

165 Epochs corresponding to each construction period were defined as 0-3 sec relative to the onset of the  
166 SD or SA object description, and concatenated across scanning blocks. Source reconstruction was  
167 performed using a linearly constrained minimum variance (LCMV) beamformer (Van Veen et al.,  
168 1997). This approach allowed us to estimate power differences between SD and SA objects in source  
169 space within selected frequency bands: theta (4-8 Hz), alpha (9-12 Hz), beta (13-30 Hz), and gamma  
170 (30-100 Hz).

171 For each participant, a set of filter weights was built based on data from the SD and SA conditions  
172 within each frequency band, and a 0-3 sec time window encapsulating a construction period.  
173 Coregistration to MNI space was performed using a 5 mm volumetric grid and was based on nasion,  
174 left and right preauricular fiducials. The forward model was computed using a single-shell head model  
175 (Nolte, 2003). At the first level, power in a particular frequency band was estimated to create one image  
176 per object type (SD or SA) per participant. Images were spatially smoothed using a 12 mm Gaussian  
177 kernel and entered into a second-level random effects paired t-test to determine power differences  
178 between SD objects and SA objects across the whole brain. An uncorrected threshold of  $p < 0.001$  with  
179 a cluster extent threshold of  $>100$  voxels was applied to each contrast, given our a priori ROIs. The  
180 same beamforming protocol was followed when objects were re-categorized as permanent and non-  
181 permanent, with the number of permanent and non-permanent objects equalized to 65 in each category.  
182 In another beamformer, each object type was contrasted with the pre-stimulus fixation period to  
183 ascertain whether differences observed represented power increases or decreases from baseline.  
184 Following these whole brain analyses, targeted ROI analyses were performed using separate bilateral  
185 anatomical masks (created using WFU PickAtlas; <http://fmri.wfubmc.edu/software/pickatlas>) covering  
186 the vmPFC, anterior hippocampus, posterior hippocampus (included for completeness), PHC and RSC,  
187 with a FWE corrected threshold of  $p < 0.05$ . Brain areas identified in the whole brain SD versus SA  
188 beamformer provided the seed regions for the subsequent effective connectivity analysis.

### 189 *Dynamic Causal Modelling (DCM)*

190 Effective connectivity was assessed using DCM for cross spectral densities (Moran et al., 2009), which  
191 permitted us to compare different biologically plausible models of how one brain region influences  
192 another, as well as mutual entrainment between regions (Friston, 2009; Kahan and Foltynie, 2013).  
193 Random-effects Bayesian model selection (BMS) was performed to compare the evidence for each  
194 specified model that varied according to which connections were modulated by SD relative to SA  
195 objects (Klaas et al., 2009). We determined the winning model to be the one with the greatest  
196 exceedance probability. To assess the consistency of the model fit, we also calculated the log Bayes  
197 factor for each participant.

## 198 **RESULTS**

### 199 **Behavioral Data**

200 There was no significant difference in the vividness of mental imagery between SD-majority ( $M =$   
201 3.91, standard deviation = 0.69) and SA-majority ( $M = 3.89$ , standard deviation = 0.66) scene trials



202 ( $t_{(22)} = 0.464, p = 0.647$ ). Participants correctly identified on average 97.52% (standard deviation =  
203 0.39) of catch trials, indicating that they attended throughout the experiment.

204 The effect of object type (SD, SA) and construction stage (first, second, third) on eye-  
205 movement fixation count (Fix<sub>Count</sub>) and fixation duration (Fix<sub>Dur</sub>) showed that there were no significant  
206 main effects of object type (Fix<sub>Count</sub>:  $F_{(1,18)} = 1.908, p = 0.184$ ; Fix<sub>Dur</sub>:  $F_{(1,18)} = 0.086, p = 0.772$ ) or  
207 construction stage (Fix<sub>Count</sub>:  $F_{(2,36)} = 0.292, p = 0.748$ ; Fix<sub>Dur</sub>:  $F_{(2,36)} = 0.535, p = 0.590$ ), and no object  
208 type×construction stage interaction (Fix<sub>Count</sub>:  $F_{(2,36)} = 0.710, p = 0.499$ ; Fix<sub>Dur</sub>:  $F_{(2,36)} = 1.871, p =$   
209  $0.169$ ). Heat maps of the spatial patterns of fixations during the task demonstrated a consistent  
210 adherence to cue configuration instructions across participants (Figure 2).

211 In terms of recognition memory (see Table 1), performance exceeded 80% correct for both SD  
212 and SA objects, and for  $d'$  and  $c$  there were no significant effects of object type ( $d'$ :  $F_{(1,22)} = 0.469, p$   
213  $= 0.500$ ;  $c$ :  $F_{(1,22)} = 0.012, p = 0.915$ ), construction stage ( $d'$ :  $F_{(2,44)} = 2.383, p = 0.104$ ;  $c$ :  $F_{(2,44)} =$   
214  $0.120, p = 0.887$ ), nor were there any interactions ( $d'$ :  $F_{(2,44)} = 1.431, p = 0.250$ ;  $c$ :  $F_{(2,44)} = 0.035, p =$   
215  $0.965$ ).

## 216 **MEG Data**

### 217 ***Power Changes***

218 A whole brain beamforming analysis revealed significant theta power attenuation for SD compared to  
219 SA objects in only two regions: the right vmPFC (peak MNI = 12, 60, -8;  $t$ -value = 3.66; cluster size  
220 = 1960) and right superior temporal gyrus (STG; peak MNI = 66, -6, -12;  $t$ -value = 3.76; cluster size  
221 = 1197) (Figure 3A). In the subsequent targeted ROI analyses, only a power change in vmPFC was  
222 evident.

223 A subsequent contrast between each object type and the baseline revealed that the theta power  
224 changes were decreases, echoing numerous previous reports of power decreases during the  
225 construction of scene imagery (e.g., Guderian et al., 2009; Barry et al., 2019a, 2019b) and memory  
226 recall (e.g., Solomon et al., 2019; McCormick et al., 2020).

227 We did not observe any significant differences in theta power between permanent and non-  
228 permanent objects across the whole brain or in the ROIs.

229 Analysis of alpha, beta and gamma showed no significant power differences across the whole  
230 brain or within the ROIs when SD and SA objects were compared.

### 231 ***Effective Connectivity***

232 Having established a response to object type in the vmPFC and STG, we next sought to examine the  
233 effective connectivity between these regions. We tested three simple hypotheses: (1) vmPFC and STG  
234 are mutually entrained, (2) STG drives vmPFC, or (3) vmPFC drives STG. We embodied each  
235 hypothesis as a DCM where models differed in which connection could be modulated by SD relative  
236 to SA objects. BMS identified the winning model to be vmPFC driving STG during SD more so than  
237 SA objects, with an exceedance probability of 91.62% (Figure 3B, left panel). This model was also  
238 the most consistent across participants (Figure 3B, right panel).

239

240

## 241 **DISCUSSION**

242 In this study we focused on an object property, SD-SA, that has been shown to influence how scene  
243 imagery is constructed (Mullally and Maguire, 2013). We found that while these object types were  
244 being imagined during scene construction, SD objects elicited theta changes relative to SA objects in  
245 two brain regions, the vmPFC and STG. Furthermore, the vmPFC drove STG theta activity.

246 SD and SA objects were matched in terms of the vividness of mental imagery, eye movements  
247 and incidental memory encoding. All objects were incorporated into the same three-object scene  
248 structures within which the order of SD or SA object presentation and object locations were carefully  
249 controlled. We also examined object permanence, and found that this property did not engage the  
250 vmPFC or STG. Our findings are therefore unlikely to be explained by these factors.

251 Most of our ROIs, selected because of their previous association with scenes, did not respond  
252 to SD objects during scene construction. This is likely because scene processing was constant  
253 throughout the experiment, and so there was no variation required in the activity of these areas. It is  
254 notable that the PHC, which was active during fMRI in response to SD objects when they were viewed  
255 or imagined in isolation and devoid of a scene context (Mullally and Maguire, 2011), did not exhibit  
256 power changes during scene construction. It may be that examining objects in isolation afforded a  
257 “purer” expression of SD whereas, once these objects were included in scene building, higher-order  
258 areas then came online to direct their use in constructing scene representations, a possibility that we  
259 discuss next.

260 Considering first the STG, this brain area was not among our a priori ROIs. Although this is a  
261 region that has been linked to speech processing (e.g., Hullett et al., 2016), the close matching of  
262 auditory stimuli and the absence of activity changes in other auditory areas suggests this factor does  
263 not account for its responsivity to SD objects. Perhaps more germane is the location of the STG within  
264 the anterior temporal lobe, a key neural substrate of semantic and conceptual knowledge that supports  
265 object recognition (Peelen and Caramazza, 2012; Chiou and Lambon Ralph, 2016). Patients with  
266 semantic dementia, caused by atrophy to the anterior temporal lobe, lose conceptual but not perceptual  
267 knowledge about common objects (Campo et al., 2013; Guo et al., 2013).

268 This could mean that SD objects provide conceptual information that is registered by the STG.  
269 Why might this be relevant to scene construction? Prior expectations have a striking top-down  
270 modulatory influence on our perception of the world, enabling us to process complex surroundings in  
271 an efficient manner (Summerfield and Egnér, 2009), and resolve ambiguity (Chiou and Lambon Ralph,  
272 2016). Without this knowledge, we are unable to understand how and where an object should be used  
273 (Peelen and Caramazza, 2012). Therefore, objects are an important source of information about the  
274 category of scene being imagined (or viewed), facilitating a rapid, efficient interpretation of the scene  
275 ‘gist’ without the need to process every component of a scene (Oliva and Torralba, 2006; Summerfield  
276 and Egnér, 2009; Clarke and Tyler, 2015; Trapp and Bar, 2015). For example, if we see a park bench  
277 this might indicate the scene is from a park. Although in the current study the scenes were deliberately  
278 composed of semantically unrelated objects, this may not have impeded the STG in nevertheless  
279 registering SD objects more so than SA objects because SD objects would normally offer useful  
280 conceptual information to help anchor a scene.

281 The operation of the STG might be facilitated by the vmPFC. Converging evidence across  
282 multiple studies has shown that the part of the vmPFC that was active in response to SD objects plays  
283 a role in the abstraction of key features across multiple episodes (Roy et al., 2012). These contribute



284 to the formation of schemas, which are internal models of the world representing elements that likely  
285 exist in a prototypical scene, based on previous exposure to such scenes (van Kesteren et al., 2013;  
286 Gilboa and Marlatte, 2017). For instance, a park typically contains benches, trees and flowers. SD  
287 objects may be particularly useful in building scene schema, and hence the response to them by the  
288 vmPFC.

289 Patients with damage to the vmPFC exhibit deficits that suggest aberrant schema re-activation  
290 (Ciaramelli et al., 2006; Gilboa et al., 2006; Ghosh et al., 2014), and this has led to the proposal that  
291 vmPFC may activate relevant schema to orchestrate the mental construction of scenes performed  
292 elsewhere – for example, in the hippocampus (McCormick et al., 2018; Ciaramelli et al., 2019; Monk  
293 et al., preprint). Our DCM findings extend this work by showing that the vmPFC also exerts influence  
294 over the STG, indicating it engages in top-down modulation of conceptual object processing by the  
295 STG, specifically during the processing of SD objects. Our results may therefore indicate that SD  
296 objects help to define a scene by priming relevant schemas in the vmPFC which then guide conceptual  
297 processing in areas such as the STG.

298 There is another possible explanation for our findings. In the current study, the scenes were  
299 deliberately composed of semantically unrelated objects, and this could have introduced ambiguity  
300 about a scene's identity. vmPFC and STG engagement may therefore be evidence of additional neural  
301 processing that was required to resolve incongruences inherent to acontextual scenes (Chiou and  
302 Lambon Ralph, 2016; Brandman and Peelen, 2017; Epstein and Baker, 2019), perhaps by drawing  
303 upon existing schemas in the pursuit of an appropriate scene template. Indeed, connectivity between  
304 medial prefrontal and medial temporal cortex has been shown to increase when novel information that  
305 was less congruent with pre-existing schematic representations was processed (van Kesteren et al.,  
306 2010; Chiou and Lambon Ralph, 2016). It should be noted that our study was not designed to  
307 investigate schema, and consequently these possible interpretations remain speculative. Future studies  
308 will be needed to further elucidate the SD-SA difference revealed here, perhaps by comparing  
309 semantically related and unrelated objects during scene construction, and by adapting the current  
310 paradigm to test patients with vmPFC or STG damage.

311 In conclusion, this study revealed the neural dynamics associated with a specific object property  
312 during scene construction. SD objects were processed differently compared to SA objects, and we  
313 suggest that they may activate schematic and conceptual knowledge in vmPFC and STG upon which  
314 scene representations are built.

## 315 **DATA AVAILABILITY STATEMENT**

316 The raw data supporting the conclusions of this manuscript, and the test materials, will be made  
317 available by the authors to any qualified researcher upon request. Requests can be sent to  
318 [e.maguire@ucl.ac.uk](mailto:e.maguire@ucl.ac.uk).

## 319 **ETHICS STATEMENT**

320 The study was approved by the University College London Research Ethics Committee (project ID:  
321 1825/005). All participants gave written informed consent in accordance with the Declaration of  
322 Helsinki.

323

## 324 **AUTHOR CONTRIBUTIONS**

325 AMM and EAM designed the study. AMM collected and analyzed the data with input from EAM and  
326 GRB. AMM and EAM wrote the manuscript. All authors contributed to manuscript revision, read and  
327 approved the submitted version.

## 328 **FUNDING**

329 This work was supported by a Wellcome Principal Research Fellowship to EAM (210567/Z/18/Z) and  
330 the Centre by a Centre Award from the Wellcome Trust (203147/Z/16/Z).

## 331 **ACKNOWLEDGEMENTS**

332 Thanks to Marshall Dalton for providing the task stimuli, Peter Zeidman for his DCM advice, and  
333 Daniel Bates, David Bradbury and Eric Featherstone for technical support.

## 334 **CONFLICTS OF INTEREST**

335 The authors declare that the research was conducted in the absence of any commercial or financial  
336 relationships that could be construed as a potential conflict of interest.

## 337 **REFERENCES**

- 338 Andrews-Hanna, J. R., Reidler, J. S., Sepulcre, J., Poulin, R., and Buckner, R. L. (2010). Functional-  
339 anatomic fractionation of the brain's default network. *Neuron* 65, 550–562.  
340 doi:10.1016/j.neuron.2010.02.005.
- 341 Auger, S. D., and Maguire, E. A. (2013). Assessing the mechanism of response in the retrosplenial  
342 cortex of good and poor navigators. *Cortex* 49, 2904–2913. doi:10.1016/j.cortex.2013.08.002.
- 343 Auger, S. D., Mullally, S. L., and Maguire, E. A. (2012). Retrosplenial Cortex Codes for Permanent  
344 Landmarks. *PLoS One* 7, e43620. doi:10.1371/journal.pone.0043620.
- 345 Auger, S. D., Zeidman, P., and Maguire, E. A. (2015). A central role for the retrosplenial cortex in de  
346 novo environmental learning. *Elife* 4. doi:10.7554/eLife.09031.
- 347 Barry, D. N., Barnes, G. R., Clark, I. A., and Maguire, E. A. (2019a). The neural dynamics of novel  
348 scene imagery. *J. Neurosci.* 39, 4375–4386. doi:10.1523/JNEUROSCI.2497-18.2019.
- 349 Barry, D. N., Tierney, T. M., Holmes, N., Boto, E., Roberts, G., Leggett, J., et al. (2019b). Imaging  
350 the human hippocampus with optically-pumped magnetoencephalography. *Neuroimage* 203.  
351 doi:10.1016/j.neuroimage.2019.116192.
- 352 Bertossi, E., Aleo, F., Braghittoni, D., and Ciaramelli, E. (2016). Stuck in the here and now:  
353 Construction of fictitious and future experiences following ventromedial prefrontal damage.  
354 *Neuropsychologia* 81, 107–116. doi:10.1016/j.neuropsychologia.2015.12.015.
- 355 Brandman, T., and Peelen, M. V. (2017). Interaction between scene and object processing revealed  
356 by human fMRI and MEG decoding. *J. Neurosci.* 37, 0582–17.  
357 doi:10.1523/JNEUROSCI.0582-17.2017.

- 358 Byrne, P., Becker, S., and Burgess, N. (2007). Remembering the past and imagining the future: A  
359 neural model of spatial memory and imagery. *Psychol. Rev.* 114, 340–375. doi:10.1037/0033-  
360 295X.114.2.340.
- 361 Campo, P., Poch, C., Toledano, R., Igoa, J. M., Belinchón, M., García-Morales, I., et al. (2013).  
362 Anterobasal temporal lobe lesions alter recurrent functional connectivity within the ventral  
363 pathway during naming. *J. Neurosci.* 33, 12679–12688. doi:10.1523/JNEUROSCI.0645-  
364 13.2013.
- 365 Chiou, R., and Lambon Ralph, M. A. (2016). The anterior temporal cortex is a primary semantic  
366 source of top-down influences on object recognition. *Cortex* 79, 75–86.  
367 doi:10.1016/j.cortex.2016.03.007.
- 368 Ciaramelli, E., De Luca, F., Monk, A. M., McCormick, C., and Maguire, E. A. (2019). What “wins”  
369 in VMPFC: Scenes, situations, or schema? *Neurosci. Biobehav. Rev.* 100, 208–210.  
370 doi:10.1016/j.neubiorev.2019.03.001.
- 371 Ciaramelli, E., Ghetti, S., Frattarelli, M., and Làdavas, E. (2006). When true memory availability  
372 promotes false memory: Evidence from confabulating patients. *Neuropsychologia* 44, 1866–  
373 1877. doi:10.1016/j.neuropsychologia.2006.02.008.
- 374 Clark, I. A., Hotchin, V., Monk, A., Pizzamiglio, G., Liefgreen, A., and Maguire, E. A. (2019).  
375 Identifying the cognitive processes underpinning hippocampal-dependent tasks. *J. Exp.*  
376 *Psychol. Gen.* 148, 1861–1881. doi:10.1037/xge0000582.
- 377 Clark, I. A., Monk, A. M., Maguire, E. A. (2020). Characterising strategy use during the performance  
378 of hippocampal-dependent tasks. *Frontiers in Psychol.* (in press).  
379 <https://www.biorxiv.org/content/10.1101/807990v3>
- 380 Clarke, A., and Tyler, L. K. (2015). Understanding what we see: How we derive meaning from  
381 vision. *Trends Cogn. Sci.* 19, 677–687. doi:10.1016/j.tics.2015.08.008.
- 382 Dalton, M. A., Zeidman, P., McCormick, C., and Maguire, E. A. (2018). Differentiable processing of  
383 objects, associations, and scenes within the hippocampus. *J. Neurosci.* 38, 8146–8159.  
384 doi:10.1523/JNEUROSCI.0263-18.2018.
- 385 Epstein, R. A. (2008). Parahippocampal and retrosplenial contributions to human spatial navigation.  
386 *Trends Cogn. Sci.* 12, 388–396. doi:10.1016/j.tics.2008.07.004.
- 387 Epstein, R. A., and Baker, C. I. (2019). Scene perception in the human brain. *Annu. Rev. Vis. Sci.* 5,  
388 373–397. doi:10.1146/annurev-vision-091718-014809.
- 389 Epstein, R. A., Patai, E. Z., Julian, J. B., and Spiers, H. J. (2017). The cognitive map in humans:  
390 Spatial navigation and beyond. *Nat. Neurosci.* 20, 1504–1513. doi:10.1038/nn.4656.
- 391 Epstein, R., and Kanwisher, N. (1998). A cortical representation the local visual environment. *Nature*  
392 392, 598–601. doi:10.1038/33402.
- 393 Friston, K. (2009). Causal modelling and brain connectivity in functional magnetic resonance  
394 imaging. *PLoS Biol.* 7, e1000033. doi:10.1371/journal.pbio.1000033.

- 395 Ghosh, V. E., Moscovitch, M., Colella, B. M., and Gilboa, A. (2014). Schema representation in  
396 patients with ventromedial PFC lesions. *J. Neurosci.* 34, 12057–12070.  
397 doi:10.1523/JNEUROSCI.0740-14.2014.
- 398 Gilboa, A., Alain, C., Stuss, D. T., Melo, B., Miller, S., and Moscovitch, M. (2006). Mechanisms of  
399 spontaneous confabulations: A strategic retrieval account. *Brain* 129, 1399–1414.  
400 doi:10.1093/brain/awl093.
- 401 Gilboa, A., and Marlatte, H. (2017). Neurobiology of schemas and schema-mediated memory.  
402 *Trends Cogn. Sci.* 21, 618–631. doi:10.1016/j.tics.2017.04.013.
- 403 Guderian, S., Schott, B. H., Richardson-Klavehn, A., and Düzel, E. (2009). Medial temporal theta  
404 state before an event predicts episodic encoding success in humans. *Proc. Natl. Acad. Sci. U.*  
405 *S. A.* 106, 5365–5370. doi:10.1073/pnas.0900289106.
- 406 Guo, C. C., Gorno-Tempini, M. L., Gesierich, B., Henry, M., Trujillo, A., Shany-Ur, T., et al. (2013).  
407 Anterior temporal lobe degeneration produces widespread network-driven dysfunction. *Brain*  
408 136, 2979–2991. doi:10.1093/brain/awt222.
- 409 Hassabis, D., Kumaran, D., and Maguire, E. A. (2007a). Using imagination to understand the neural  
410 basis of episodic memory. *J. Neurosci.* 27, 14365–14374. doi:10.1523/JNEUROSCI.4549-  
411 07.2007.
- 412 Hassabis, D., Kumaran, D., Vann, S. D., and Maguire, E. A. (2007b). Patients with hippocampal  
413 amnesia cannot imagine new experiences. *Proc. Natl. Acad. Sci. U. S. A.* 104, 1726–1731.  
414 doi:10.1073/pnas.0610561104.
- 415 Hullett, P. W., Hamilton, L. S., Mesgarani, N., Schreiner, C. E., and Chang, E. F. (2016). Human  
416 superior temporal gyrus organization of spectrotemporal modulation tuning derived from  
417 speech stimuli. *J. Neurosci.* 36, 2014–2026. doi:10.1523/JNEUROSCI.1779-15.2016.
- 418 Julian, J. B., Ryan, J., and Epstein, R. A. (2017). Coding of object size and object category in human  
419 visual cortex. *Cereb. Cortex* 27, 3095–3109. doi:10.1093/cercor/bhw150.
- 420 Kahan, J., and Foltynie, T. (2013). Understanding DCM: Ten simple rules for the clinician.  
421 *Neuroimage* 83, 542–549. doi:10.1016/j.neuroimage.2013.07.008.
- 422 Kravitz, D. J., Peng, C. S., and Baker, C. I. (2011). Real-world scene representations in high-level  
423 visual cortex: It’s the spaces more than the places. *J. Neurosci.* 31, 7322–7333.  
424 doi:10.1523/JNEUROSCI.4588-10.2011.
- 425 Macmillan, N. A., and Creelman, C. D. (1990). Response bias: Characteristics of detection theory,  
426 threshold theory, and “nonparametric” indexes. *Psychol. Bull.* 107, 401–413.  
427 doi:10.1037/0033-2909.107.3.401.
- 428 Maguire, E. A., and Mullally, S. L. (2013). The hippocampus: A manifesto for change. *J. Exp.*  
429 *Psychol. Gen.* 142, 1180–1189. doi:10.1037/a0033650.

- 430 McCormick, C., Barry, D. N., Jafarian, A., Barnes, G. R., and Maguire, E. A. (2020). vmPFC Drives  
431 Hippocampal Processing during Autobiographical Memory Recall Regardless of Remoteness.  
432 *Cereb. Cortex* 00, 1–16. doi:10.1093/cercor/bhaa172.
- 433 McCormick, C., Ciaramelli, E., De Luca, F., and Maguire, E. A. (2018). Comparing and contrasting  
434 the cognitive effects of hippocampal and ventromedial prefrontal cortex damage: A review of  
435 human lesion studies. *Neuroscience* 374, 295–318. doi:10.1016/j.neuroscience.2017.07.066.
- 436 Monk, A. M., Dalton, M. A., Barnes, G. R., and Maguire, E. A. (preprint). The role of hippocampal-  
437 vmPFC neural dynamics in building mental representations.  
438 <https://www.biorxiv.org/content/10.1101/2020.04.30.069765v2>.
- 439 Moran, R. J., Stephan, K. E., Seidenbecher, T., Pape, H. C., Dolan, R. J., and Friston, K. J. (2009).  
440 Dynamic causal models of steady-state responses. *Neuroimage* 44, 796–811.  
441 doi:10.1016/j.neuroimage.2008.09.048.
- 442 Morgan, L. K., MacEvoy, S. P., Aguirre, G. K., and Epstein, R. A. (2011). Distances between real-  
443 world locations are represented in the human hippocampus. *J. Neurosci.* 31, 1238–1245.  
444 doi:10.1523/JNEUROSCI.4667-10.2011.
- 445 Mullally, S. L., and Maguire, E. A. (2011). A new role for the parahippocampal cortex in  
446 representing space. *J. Neurosci.* 31, 7441–7449. doi:10.1523/JNEUROSCI.0267-11.2011.
- 447 Mullally, S. L., and Maguire, E. A. (2013). Exploring the role of space-defining objects in  
448 constructing and maintaining imagined scenes. *Brain Cogn.* 82, 100–107.  
449 doi:10.1016/j.bandc.2013.02.013.
- 450 Nolte, G. (2003). The magnetic lead field theorem in the quasi-static approximation and its use for  
451 magnetoencephalography forward calculation in realistic volume conductors. *Phys. Med.  
452 Biol.* 48, 3637–3652. doi:10.1088/0031-9155/48/22/002.
- 453 Oliva, A., and Torralba, A. (2006). Building the gist of a scene: the role of global image features in  
454 recognition. *Prog. Brain Res.* 155, 23–36. doi:10.1016/S0079-6123(06)55002-2.
- 455 Park, S., and Chun, M. M. (2009). Different roles of the parahippocampal place area (PPA) and  
456 retrosplenial cortex (RSC) in panoramic scene perception. *Neuroimage* 47, 1747–1756.  
457 doi:10.1016/j.neuroimage.2009.04.058.
- 458 Peelen, M. V., and Caramazza, A. (2012). Conceptual object representations in human anterior  
459 temporal cortex. *J. Neurosci.* 32, 15728–15736. doi:10.1523/JNEUROSCI.1953-12.2012.
- 460 Roy, M., Shohamy, D., and Wager, T. D. (2012). Ventromedial prefrontal-subcortical systems and  
461 the generation of affective meaning. *Trends Cogn. Sci.* 16, 147–156.  
462 doi:10.1016/j.tics.2012.01.005.
- 463 Solomon, E. A., Stein, J. M., Das, S., Gorniak, R., Sperling, M. R., Worrell, G., et al. (2019).  
464 Dynamic theta networks in the human medial temporal lobe support episodic memory. *Curr.  
465 Biol.* 29, 1100–1111.e4. doi:10.1016/j.cub.2019.02.020.



- 466 Stephan, K. E., Penny, W. D., Daunizeau, J., Moran, R. J., and Friston, K. J. (2009). Bayesian model  
467 selection for group studies. *Neuroimage* 46, 1004–1017.  
468 doi:10.1016/j.neuroimage.2009.03.025.
- 469 Summerfield, C., and Egner, T. (2009). Expectation (and attention) in visual cognition. *Trends Cogn.*  
470 *Sci.* 13, 403–409. doi:10.1016/j.tics.2009.06.003.
- 471 Summerfield, J. J., Hassabis, D., and Maguire, E. A. (2010). Differential engagement of brain regions  
472 within a “core” network during scene construction. *Neuropsychologia* 48, 1501–1509.  
473 doi:10.1016/j.neuropsychologia.2010.01.022.
- 474 Trapp, S., and Bar, M. (2015). Prediction, context, and competition in visual recognition. *Ann. N. Y.*  
475 *Acad. Sci.* 1339, 190–198. doi:10.1111/nyas.12680.
- 476 Troiani, V., Stigliani, A., Smith, M. E., and Epstein, R. A. (2014). Multiple object properties drive  
477 scene-selective regions. *Cereb. Cortex* 24, 883–897. doi:10.1093/cercor/bhs364.
- 478 van Kesteren, M. T. R., Beul, S. F., Takashima, A., Henson, R. N., Ruiters, D. J., and Fernández, G.  
479 (2013). Differential roles for medial prefrontal and medial temporal cortices in schema-  
480 dependent encoding: From congruent to incongruent. *Neuropsychologia* 51, 2352–2359.  
481 doi:10.1016/j.neuropsychologia.2013.05.027.
- 482 van Kesteren, M. T. R., Fernandez, G., Norris, D. G., and Hermans, E. J. (2010). Persistent schema-  
483 dependent hippocampal-neocortical connectivity during memory encoding and postencoding  
484 rest in humans. *Proc. Natl. Acad. Sci.* 107, 7550–7555. doi:10.1073/pnas.0914892107.
- 485 Van Veen, B. D., Van Drongelen, W., Yuchtman, M., and Suzuki, A. (1997). Localization of brain  
486 electrical activity via linearly constrained minimum variance spatial filtering. *IEEE Trans.*  
487 *Biomed. Eng.* 44, 867–880. doi:10.1109/10.623056.
- 488 Vann, S. D., Aggleton, J. P., and Maguire, E. A. (2009). What does the retrosplenial cortex do? *Nat.*  
489 *Rev. Neurosci.* 10, 792–802. doi:10.1038/nrn2733.
- 490 Zeidman, P., Mullally, S. L., and Maguire, E. A. (2015a). Constructing, perceiving, and maintaining  
491 scenes: Hippocampal activity and connectivity. *Cereb. Cortex* 25, 3836–3855.  
492 doi:10.1093/cercor/bhu266.
- 493 Zeidman, P., Lutti, A., and Maguire, E. A. (2015b). Investigating the functions of subregions within  
494 anterior hippocampus. *Cortex* 73, 240–256. doi:10.1016/j.cortex.2015.09.002.
- 495 Zeidman, P., and Maguire, E. A. (2016). Anterior hippocampus: The anatomy of perception,  
496 imagination and episodic memory. *Nat. Rev. Neurosci.* 17, 173–182.  
497 doi:10.1038/nrn.2015.24.

498 **TABLE 1** Results of the surprise post-scan object recognition memory test.

|           | SD objects    |                    | SA objects    |                    |
|-----------|---------------|--------------------|---------------|--------------------|
|           | Mean          | Standard Deviation | Mean          | Standard Deviation |
| % correct | <b>81.063</b> | <b>7.332</b>       | <b>80.074</b> | <b>8.198</b>       |
| $d'$      | 2.045         | 0.581              | 2.001         | 0.611              |
| $c$       | 0.091         | 0.282              | 0.088         | 0.272              |

499 Percent (%) correct,  $d$ prime ( $d'$ ) and response bias ( $c$ ) discrimination parameters for each object  
500 category.

501

502

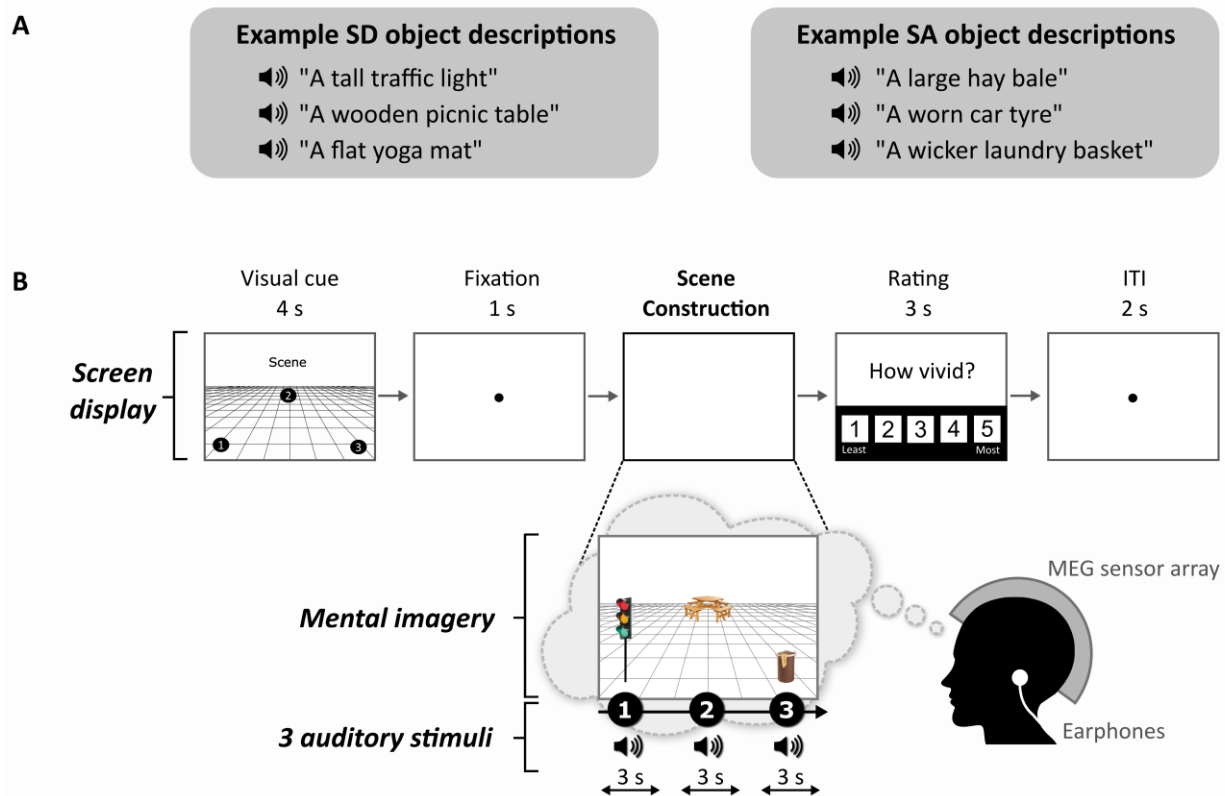

503

504 **FIGURE 1** Example stimuli and trial structure. (A) Examples of SD and SA object descriptions. (B) The  
505 structure and timings of an example trial. Note that participants never saw visual objects. During the task the  
506 participants imagined the simple scenes while looking at a blank screen.

507

508

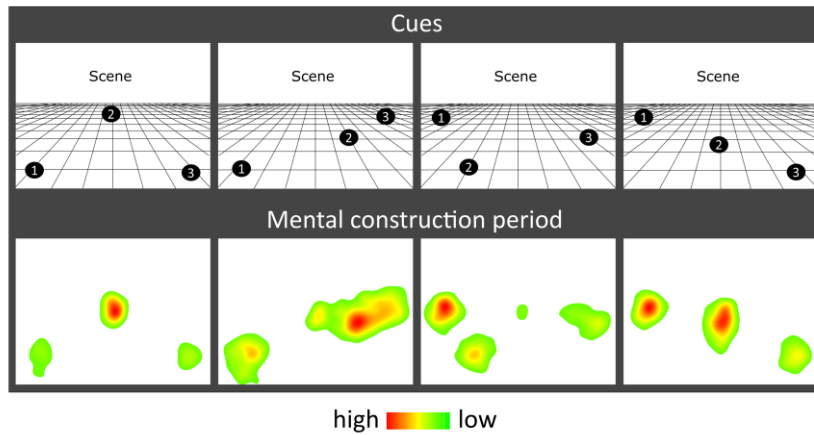

509

510 **FIGURE 2** Eye movement results. Heat maps of the fixation count during the 9 sec mental construction period  
 511 following each cue configuration. Each heat map is an aggregate of fixations on the blank screen across all trials  
 512 for that cue configuration across all participants with eye tracking data (n=19). Red indicates higher fixation  
 513 density and green lower fixation density.

514

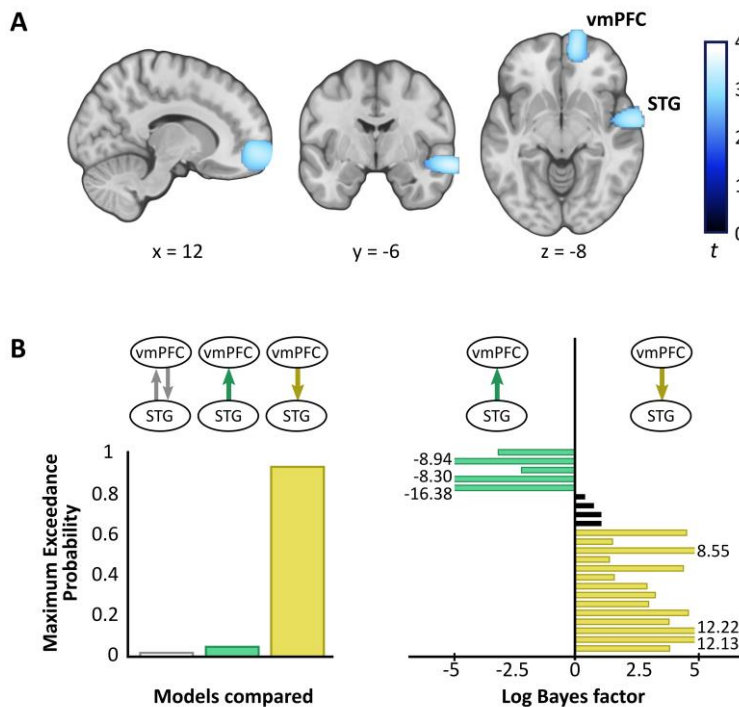

515

516 **FIGURE 3** MEG results. (A) Source reconstruction of theta (4-8 Hz) power changes during SD relative to SA  
 517 objects revealed attenuation in the ventromedial prefrontal cortex (vmPFC) and superior temporal gyrus (STG).  
 518 Images are superimposed on the MNI 152 template and thresholded at uncorrected  $p < 0.001$ . (B) Effective  
 519 connectivity between vmPFC and STG was examined using DCM. Three models were compared, with vmPFC  
 520 driving STG theta activity during SD compared to SA objects being the model that best explained the data (left  
 521 panel). Log Bayes factors per participant (right panel) showed positive to strong evidence for this model in most  
 522 participants. Participants for whom there was no conclusive evidence for either model are represented by black  
 523 bars. Where log Bayes factors exceeded five, bars are truncated and the exact values are adjacently displayed.
